# Supplementary material
Source: Springer Nature journal article supplement (https://www.springermedizin.de/resource/supplementary/12876_2011_672_MOESM1_ESM.pdf/9437684)
Supplement: MOESM1 [file 9437684]

Referred for  
colonoscopy

Referred for  
EGD

Eligible patients  
(N = 405)

Eligible patients  
(N = 170)

Excluded patients (N = 14)  
*Incomplete endoscopy (N = 4)*  
*Protocol violation (N = 10)*

Excluded patients (N = 23)  
*Incomplete endoscopy (N = 2)*  
*Protocol violation (N = 21)*

Patients included  
(N = 391)

Patients included  
(N = 147)

Study population  
(N = 538)
